# Supplementary material
Source: PubMed Central journal article supplement (PMC4194114)
Supplement: embj0033-0906-sd3.pdf [file embj0033-0906-sd3.pdf]

A

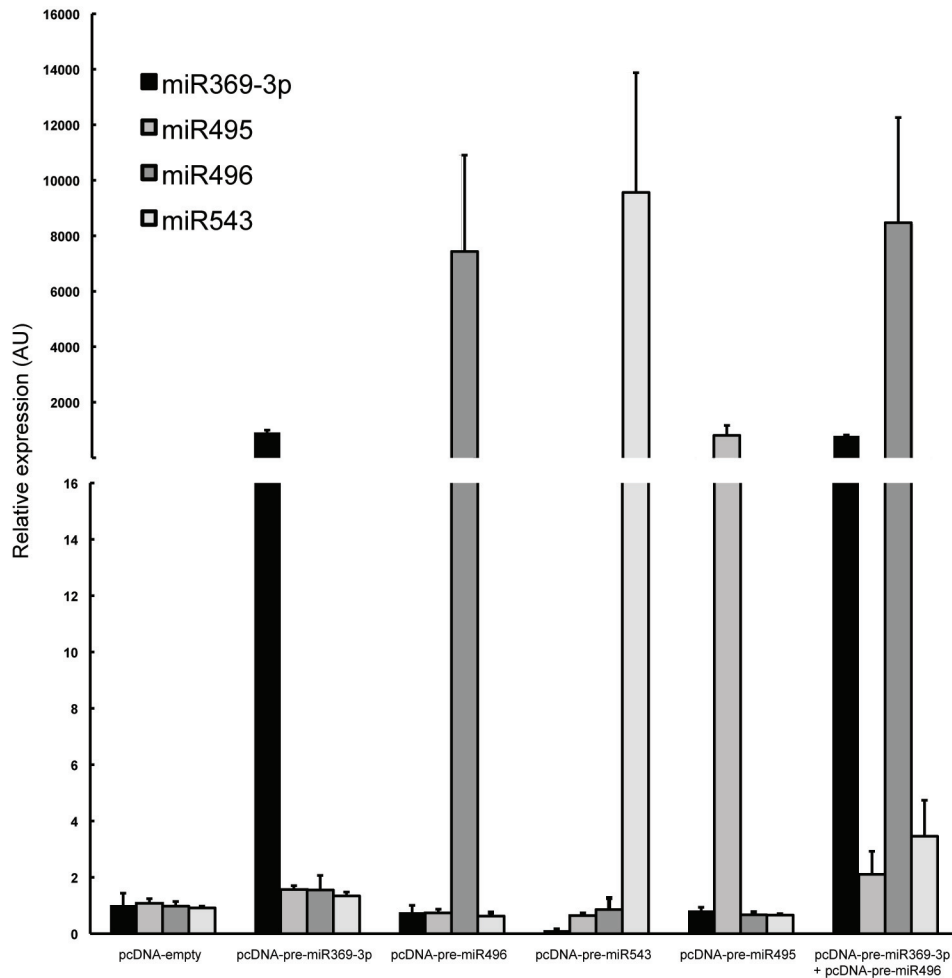

B

## N-cadherin 3'UTR

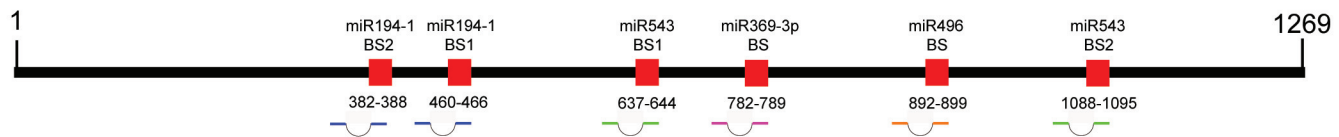

miR194-1 BS1  
 5'-ACUUUUGUUACAA-3'  
 3'-GACAAUG-5'  
 miR194-1 seed sequence

3'UTR site1 mut  
 5'-ACUUUUCAAUGAA-3'  
 X  
 3'-GACAAUG-5'

miR496 BS  
 5'-GUUAGAAUACUCA-3'  
 3'-UUAUGAG-5'  
 miR496 seed sequence

3'UTR site1 mut  
 5'-GUUAGUUAUGAGA-3'  
 X  
 3'-UUAUGAG-5'

miR194-1 BS2  
 5'-GAUUUUGUUACCU-3'  
 3'-GACAAUG-5'  
 miR194-1 seed sequence

3'UTR site2 mut  
 5'-GAUUUUCAAUGCU-3'  
 X  
 3'-GACAAUG-5'

miR543 BS1  
 5'-AACUAGAAUGUUAG-3'  
 3'-CUUACAA-5'  
 miR543 seed sequence

3'UTR site1 mut  
 5'-AACUCUUACAAAG-3'  
 X  
 3'-CUUACAA-5'

miR369-3p BS  
 5'-UGUAUGUAAUU-3'  
 3'-CAUAAUA-5'  
 miR369-3p seed sequence

3'UTR site1 mut  
 5'-UGUAUCAAUAU-3'  
 X  
 3'-CAUAAUA-5'

miR543 BS2  
 5'-CAAGUGUGUUAU-3'  
 3'-CUUACAA-5'  
 miR543 seed sequence

3'UTR site2 mut  
 5'-CAAGUCUUACAAAU-3'  
 X  
 3'-CUUACAA-5'

**Supplementary Figure 2.** Related to Figure 2. The overexpression of the miRNAs in transfected HEK-293 cells is effective. (A) HEK-293 cells were transfected with the empty vector pcDNA3.1 (pcDNA-empty) and with the vector containing each indicated pre-miRNA. Forty-eight hours later the cells were harvested, small RNAs were isolated, and qRT-PCR for each miRNA was performed. (B) Representation of the Ncad 3'UTR. Predicted binding sites for each miRNA is represented as red boxes with the relative nucleotide position indicated. Seed sequence of the miRNAs is represented in colors, and predicted binding sites within the Ncad 3'UTR is shown in bold black letters. Predicted binding sites mutations are shown in bold red letters.
