# Supplementary material
Source: PubMed Central journal article supplement (PMC4194114)
Supplement: embj0033-0906-sd5.pdf [file embj0033-0906-sd5.pdf]

**A**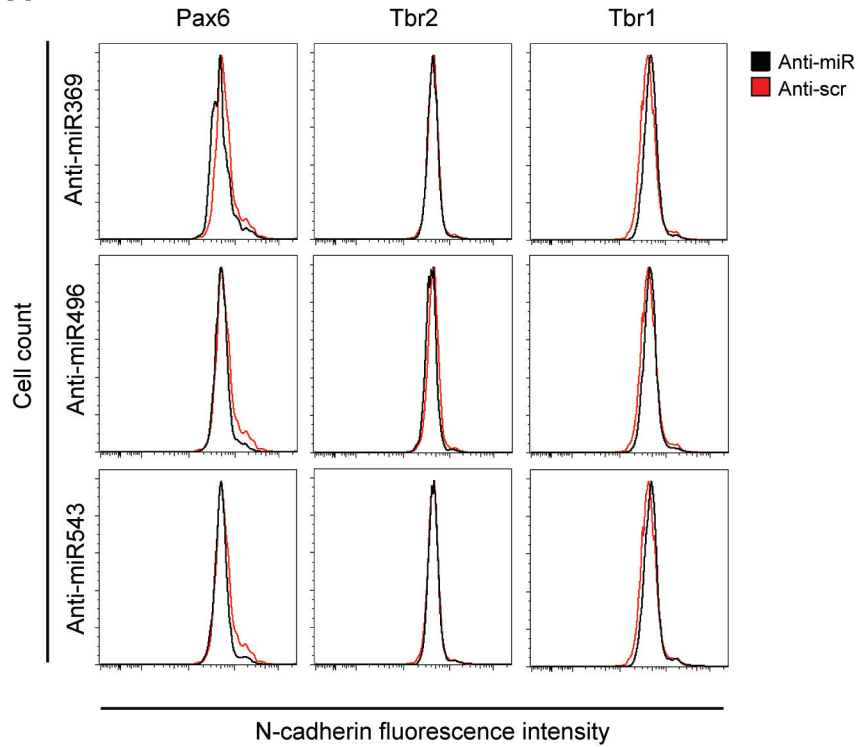**B**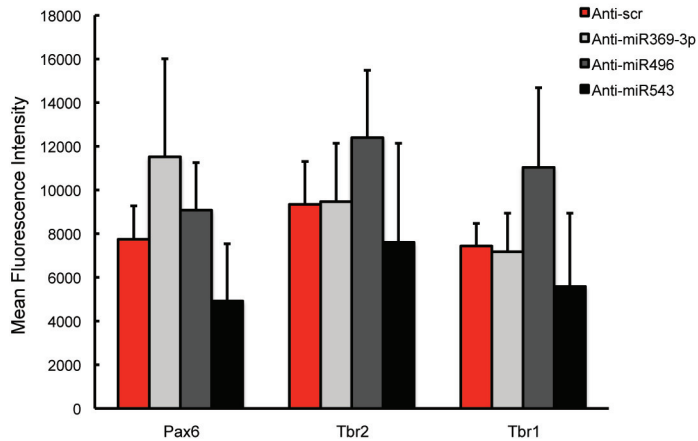

**Supplementary Figure 4.** Related to Figure 4. The expression level of N-cadherin at the cell surface of Pax6<sup>+</sup>, Tbr2<sup>+</sup>, and Tbr1<sup>+</sup> cells after knockdown of miR369-3p, miR496 or miR543. Cells were stained for cell surface N-cadherin, followed by fixation, permeabilisation and staining for nuclear markers. (A) No shift in the intensity for N-cadherin at the cell surface is evidenced when each individual miRNA is knocked down. (B) Quantification of four independent experiments for the knockdown of individual miRNAs.
