# Supplementary material
Source: PubMed Central journal article supplement (PMC4194114)
Supplement: embj0033-0906-sd7.pdf [file embj0033-0906-sd7.pdf]

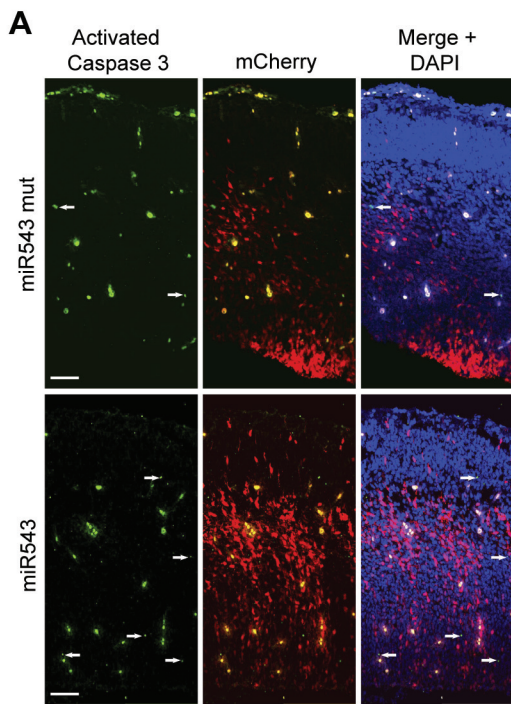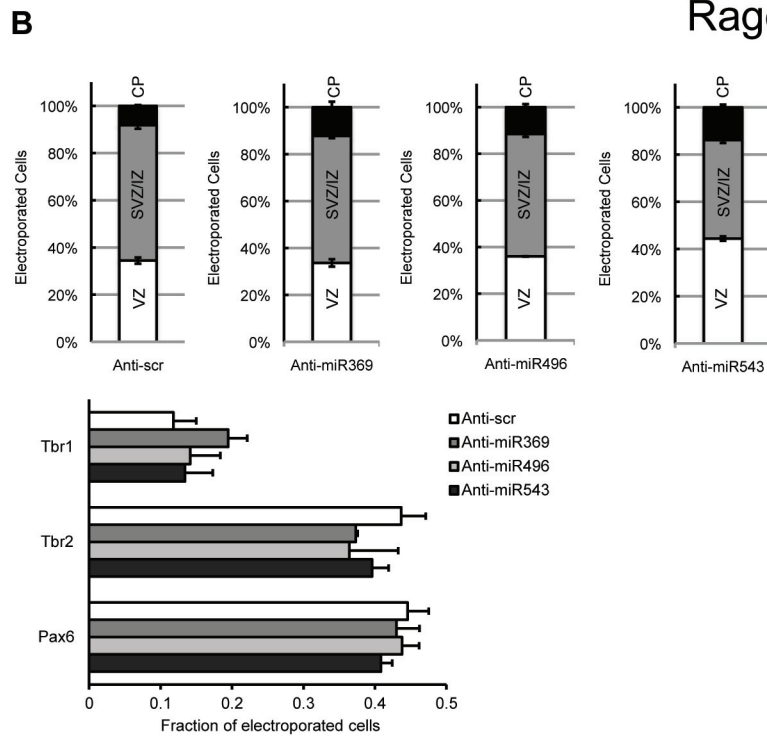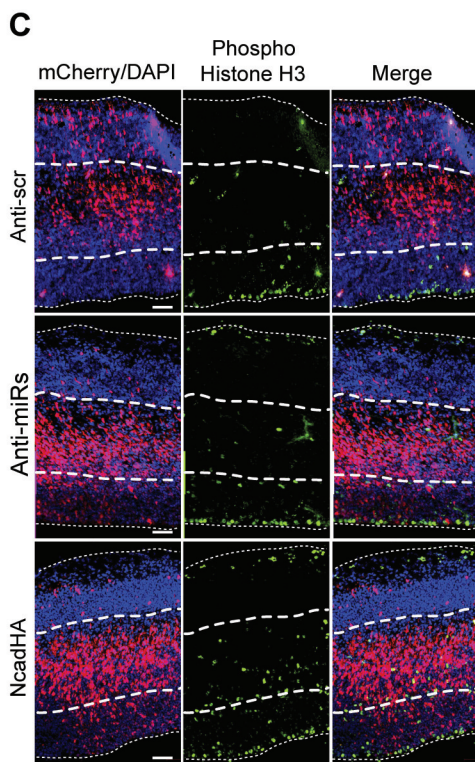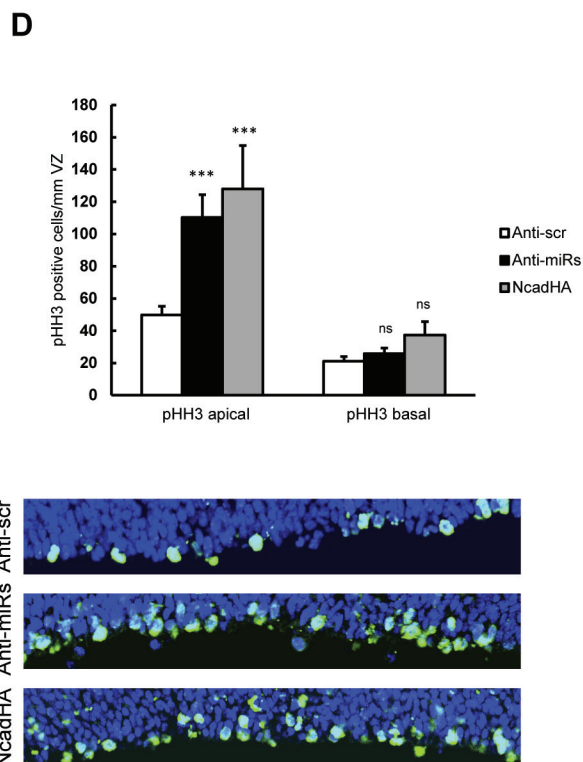

**Supplementary Figure 6.** (A) There is no increase in apoptosis after miR543 is overexpressed. Immunostaining for activated caspase 3 at E15.5 in tissues electroporated with miR543 at E13.5. Arrows indicate apoptotic cells. Scale bars: 50  $\mu\text{m}$ . (B) The histograms show the distribution of electroporated cells in the different cortical areas (upper panel) and the percentage of mCherry<sup>+</sup> Pax6<sup>+</sup>, mCherry<sup>+</sup> Tbr2<sup>+</sup> and mCherry<sup>+</sup> Tbr1<sup>+</sup> cells over the total population of mCherry<sup>+</sup> cells (lower panel) after knockdown of miR369-3p, miR496 or miR543 at E13.5. The analysis was carried out at E15.5. No significant effect was observed. (C) The simultaneous knockdown of miR369-3p, miR496 and miR543 increases the proliferation of RGCs. Immunostaining for the mitotic marker phospho-histone 3 at E15.5, 48 hours after electroporation, was conducted. Scale bars: 50  $\mu\text{m}$ . (D) The histogram shows an increase in apical, but not basal, mitoses after knockdown of all three miRNAs. The numbers of mitotic cells were normalised to the VZ length (n=4; ns not significant; \*\*\* p < 0.001).
