# Supplementary material
Source: PubMed Central journal article supplement (PMC4194114)
Supplement: embj0033-0906-sd9.pdf [file embj0033-0906-sd9.pdf]

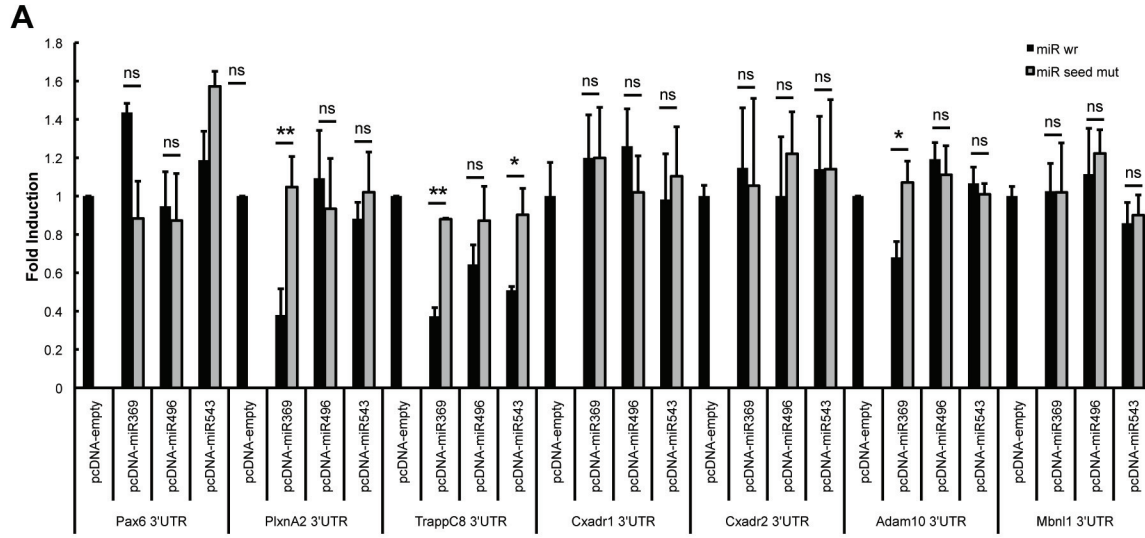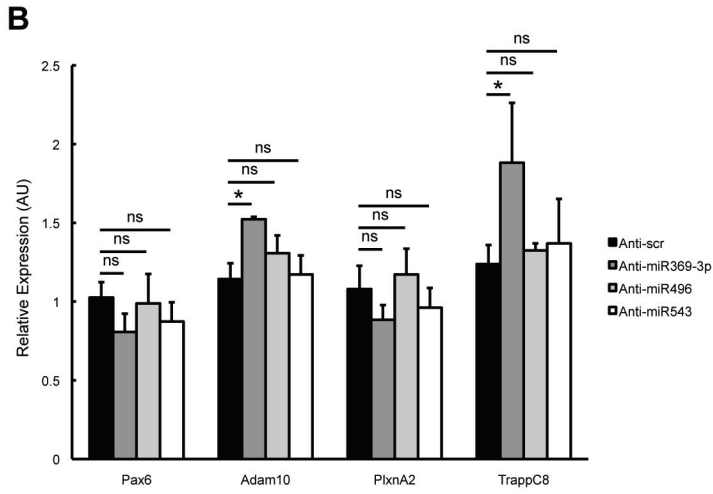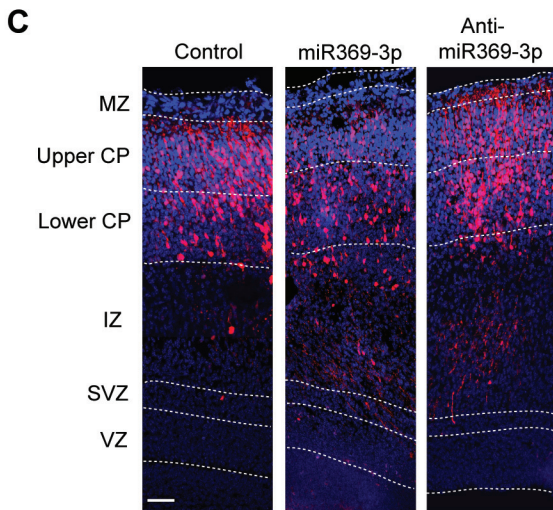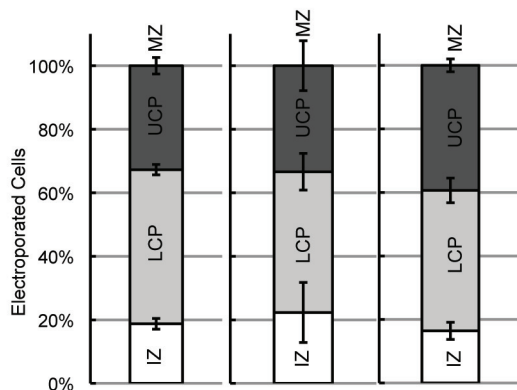

**Supplementary Figure 8.** miR369-3p interacts directly with the 3'UTRs of other predicted targets and regulates their expression. (A) Shared putative targets for miR369-3p and miR496, or miR369-3P, miR496 and miR543 were cloned downstream of the Firefly luciferase gene into the pGL3P vector. Forty-eight hours after transfection of the indicated plasmids into HEK293 cells, luciferase assays were performed. (B) Brains were electroporated with anti-miRs LNAs control (Anti-scr) against miR369-3p (Anti-369-3p), miR496 (Anti-496) or miR543 (Anti-543). Forty-eight hours later, the electroporated regions were micro-dissected and total mRNA was isolated and qRT-PCR was performed. Data normalized to TBP (n=4; ns, not significant; \* p<0.05; \*\* p<0.01). (C) Overexpression or knockdown of miR369-3p in newborn neurons does not affect neuronal migration. Brains were electroporated with NeuroD1-miR369-3p or LNA against miR369-3p together with NeuroD1-mCherry at E13.5 and analysis of cell positioning was performed at E17.5. No significant difference was found. Scale bar: 50  $\mu$ m. IZ, intermediate zone; LCP, lower cortical plate; UPC, upper cortical plate; MZ, marginal zone.
