# Supplementary material
Source: PubMed Central journal article supplement (PMC4194114)
Supplement: embj0033-0906-sd10.pdf [file embj0033-0906-sd10.pdf]

**Cloning Primers**

| Name     | 5'-3' Sequence                        |
|----------|---------------------------------------|
| miR190f  | ACTGTCTAGACACGAAGAAATGGAATGAAACA      |
| miR190r  | ATCGGGATCCCCTTGCCACACCTACAGACA        |
| miR218f  | GTCAGGATCCTACACAATCTGCGGGAAGAA        |
| miR218r  | GTCATCTAGAGGGCTTTTCAAGGATAATCG        |
| miR129f  | GTCAGGATCCCTCTCCAGGTCCCAGCTCT         |
| miR129r  | GTCATCTAGAAGGCTTAGGGCTTGATCCAT        |
| miR145f  | GTCAGGATCCCAGAAGAGAGCTCCCAAGACC       |
| miR145r  | GTCATCTAGAGCTCTTCCCAGAGCAGGAC         |
| miR496f  | GTCAGGATCCTAACCACCACATGCAGGAGA        |
| miR496r  | GTCATCTAGATCACCGAAATAGTGGTGCAT        |
| miR543f  | GTCAGGATCCGAGAGCCCCCTAGGTACAGC        |
| miR543r  | GTCATCTAGAGGACCATTCAAGAAGGGAGA        |
| miR208f  | GTCAGGATCCCCAGCCTAGAGGATGTGAGG        |
| miR208r  | GTCATCTAGAGATGCAGGAAAGAGCTTTGG        |
| miR499f  | GTCAGGATCCGACCGTGTCTCAGCTTCACA        |
| miR499r  | GTCATCTAGAGAGCCCAAATGCTCCTTATG        |
| miR320f  | GTCAGGATCCCCTCCGACTAGAGCAACCAC        |
| miR320r  | GTCATCTAGACTCCACATACAGCAGGTAGGC       |
| miR547f  | GTCAGGATCCGGGAACATTGCTGTCAATCC        |
| miR547r  | GTCATCTAGATGTCATTCGTGTCTTTTGAGAA      |
| miR369f  | GTCAGGATCCGGTCGACCAGCTGGAAAGTA        |
| miR369r  | GTCATCTAGAAGCACACAGCCTGTTCCAC         |
| miR338f  | GTCAGGATCCTGGCTGTTCTGCTGAGAGAT        |
| miR338r  | GTCATCTAGAATACCAACCCCAGCCTCTTT        |
| miR329f  | GTCAGGATCCAATGGCTTGCTTGAGCACTT        |
| miR329r  | GTCATCTAGACCTGGGAGGGTTTAGAGGAC        |
| miR194f  | GTCAGGATCCACCACACACCAGGAAGAGGT        |
| miR194r  | GTCATCTAGATTTGTTAGTTAGGAAACAGAATGAAGA |
| miR181f  | GTCAGGATCCGAGGAATCCTGCTTCTTTTCTTC     |
| miR181r  | GTCATCTAGACACCGACAGCAATGAATGTT        |
| miR302af | GTCAGGATCCGGTGGGTTCCCTTCAACTTT        |
| miR302ar | GTCATCTAGAAGGAGCCACCACACTCAAAC        |
| miR302cf | GTCAGGATCCTGTGGGTTTGCTCTTCTGTTT       |
| miR302cr | GTCATCTAGACCATCACCAAACATGGAAG         |
| miR495f  | GTCAGGATCCGGCCAAGTATCTGCCTCACC        |
| miR495r  | GTCATCTAGATTTGAGGTAAATGCCCTGT         |
| miR26af  | GTCAGGATCCAGGAGGACTGCCCAAGAAAA        |
| miR26ar  | GTCATCTAGAGTCTCCGGGAGGACTGCTT         |
| miR124f  | GTCAGGATCCCCATCCCCTCCCTTTCTTT         |
| miR124r  | GTCATCTAGATACTTTGCGAGGCACTCAGA        |
| miR466f  | GTCAGGATCCTGACCTACTGCTTTGGAGGT        |
| miR466r  | GTCATCTAGAATTTGAACTCCTGACCTCCTGA      |

**Seed Sequence Mutagenesis Primers**

| Name     | 5'-3' Sequence                              |
|----------|---------------------------------------------|
| miR194Mf | GGAGTCATCGGGTCATTGTGCAACTCCATGTGGACTGTGCTCG |

|          |                                                      |
|----------|------------------------------------------------------|
| miR194Mr | CGAGCACAGTCCACATGGAGTTGCACAATGACCCGATGACTCC          |
| miR369Mf | CGCTTGGCTGACTTCTTATTATGATGGTTGATCTTTTCTCAGTATCAACGC  |
| miR369Mr | GCGTTGATACTGAGAAAAGATCAACCATCATAATAAGAAGTCAGCCAAGCG  |
| miR496Mf | GGTGTGTTCATTTTATTTATGATCTCATAAACATGGCCAATCTCCTTTTCGG |
| miR496Mr | CCGAAAGGAGATTGGCCATGTTTATGAGATCATAAATAAAATGAACACACC  |
| miR499Mf | GTCTTGGGTGGGCAGCTGAATTCTGATGCAGTGATGTTTAGCTCC        |
| miR499Mr | GGAGCTAAACATCACTGCATCAGAATTCAGCTGCCACCCAAGAC         |
| miR543Mf | GCGTGTTTTTCGCTTTATATGTGACGATTGTAAGGCGGTGCACTTCTTTTTC |
| miR543Mr | GAAAAGAAGTGACCCGCCTTACAATCGTCACATATAAAGCGAAAACACGC   |

**Binding Site Mutagenesis Primers**

| Name     | 5'-3' Sequence                                             |
|----------|------------------------------------------------------------|
| 194BSM1f | TCATGGAGTGATTTACAATGCTTTGGGGTGG                            |
| 194BSM1r | CCACCCCAAAGCATTGTAAATCACTCCATGA                            |
| 194BSM2f | TGATACGCTTCAACCCACTTTACAATGAATGCATTTGCTTTTGTTAAG           |
| 194BSM2r | CTTAACAAAAGCAAATGCATTCATTGTAAAGTGGGTTGAAGCGTATCA           |
| 369BSM1f | GCAGAGAACTCGGAACATGTGTATCATAATAATGGACTTTGGATTGAGG          |
| 369BSM1r | CCTGAATCCAAAGTCCATTATTATGATACACATGTTCCGAGTTCTCTGC          |
| 369BSM2f | GGTTGCAGATAAAGGGAGTTTTTCATTAGTGGTATTTGTAGCAAATTG           |
| 369BSM2r | CAATTTTGCTACAAATACCACTAATGAAAACCTCCTTTATCTGCAACC           |
| 496BSMf  | GATTCAACTGTTGAGCTGTAGTTAGTTATGAGTATTTTTAATTTTTTAAATTTTTTTT |
| 496BSMr  | AAAAAAAAATTAATAAATAAATAACTCATAACTAACTACAGCTCAACAGTTGAAT    |
| 499BSM1f | CATAAACTAGAATGTTAGACACATTTTGCAGAATTTCCATGTACAC             |
| 499BSM1r | GTGTACATGGAAATTCTGCAAAATGTGTCTAACATTCTAGTTTATG             |
| 499BSM2f | GATAGGAAAATGTACATTACTTCTTCAGAATTACTTTAGATTTTTTTTTTTTTCAC   |
| 499BSM2r | GTGAAAAAAAAAAATCTAAAGTAATTCTGAAGAAGTAATGTACATTTTCCTA       |
| 543BSM1f | GAATTTTTTCATAAACTACTTACAAAGACACATTTTGGTCTTAATCCATGTAC      |
| 543BSM1r | GTACATGGATTAAGACCAAATGTGTCTTTGTAAGTAGTTTATGAAAAATTC        |
| 543BSM2f | GGTACTGGCAGCACTAGCAAGTCACACAAATTAATAAACAACAACAAC           |
| 543BSM2r | GTTTGTGTTGTTTTGTTTTTAAATTTGTGTGACTTGCTAGTGCTGCCAGTACC      |

**Supplementary Table S1.** Primers used to clone pre-miRNAs into the pcDNA3.1 vector.

Primers used to perform in vitro mutagenesis on the miRNAs' seed sequence and on the predicted binding sites within the N-cadherin 3'UTR.
