# Supplementary material
Source: PubMed Central journal article supplement (PMC4194114)
Supplement: embj0033-0906-sd12.pdf [file embj0033-0906-sd12.pdf]

| Shared targets | Gene name | Expression at E14.5                                           | Function                                                                                    | Reference |
|----------------|-----------|---------------------------------------------------------------|---------------------------------------------------------------------------------------------|-----------|
| miR369-3p      | INO80D    | not found in database                                         | Chromatin remodeler factor, transcriptional regulation.                                     | 1, 2      |
| miR496         | MBNL1     | not found in database                                         | RNA binding protein, splicing mediator, plays a role in muscle and eye development.         | 1, 3, 4   |
| miR543         | GJC1      | no regional signal                                            | Gap junction protein member.                                                                | 1, 5      |
|                | CYP26B1   | no regional signal                                            | Enzymes responsible of retinoic acid metabolism.                                            | 1, 6      |
|                | CXADR     | strong signal in brain, ganglia, ear, eye & nose              | Cell-to-cell adhesion mediator, component of tight junctions associated to ZO-1.            | 1, 13     |
| miR369-3p      | TRAPPC8   | not found in database                                         | Function in secretory and endocytic pathways.                                               | 1, 7      |
| miR496         | RANBP9    | no regional signal                                            | Scaffold protein promotes cofilin activation.                                               | 1, 8      |
|                | PLXNA2    | strong signal in brain and spinal chord                       | Receptor of semaphorin6A signalling.                                                        | 1, 9      |
|                | ADAM10    | strong in peripheral nervous system, ganglia, ear, eye & nose | Involved in N-cadherin cleavage and turnover.                                               | 1, 10     |
|                | PAX6      | strong signal in brain and spinal chord                       | Transcription factor expressed in RGCs in developing neocortex.                             | 1         |
|                | RORA      | strong signal in brain and spinal chord & nose                | Retinoic acid receptor with neuroprotective function during hypoxia.                        | 1, 11     |
|                | KCMF1     | no regional signal                                            | Zink finger protein, unknown transcriptional activity, upregulated in epithelial cancers.   | 1, 12     |
|                | PAPPA     | moderate signal in brain and peripheral nervous system        | Plasma protein involved in IGF-1 bioavailability.                                           | 1, 14     |
|                | CNOT2     | no regional signal                                            | Regulation of mRNA stability. Self-renewal maintenance in embryonic stem cells.             | 1, 15     |
|                | RER1      | no regional signal                                            | Putative Golgi-ER retrieval receptor involved in the biogenesis of acetylcholine receptors. | 1, 16     |
|                | NDST1     | no regional signal                                            | Heparan sulfate biosynthesis enzyme.                                                        | 1, 17     |

#### References

- Diez-Roux G., et al. A High-Resolution Anatomical Atlas of the transcriptome in the Mouse Embryo. *PLoS Biol.* 2011 Jan 18;9(1):e1000582.
- Allantaz F., et al. Expression profiling of human immune cell subsets identifies miRNA-mRNA regulatory relationships correlated with cell type specific expression. *PLoS One.* 2012;7(1):e29979.
- Wang E.T., et al. Transcriptome-wide Regulation of Pre-mRNA Splicing and mRNA Localization by Muscleblind Proteins. *Cell* (2012) 150, 710-724.
- Charizanis K., et al. Muscleblind-like 2-Mediated Alternative Splicing in the Developing Brain and Dysregulation in Myotonic Dystrophy. *Neuron* (2012) 75, 437-450.
- Blankenship A.G., et al. The Role of Neuronal Connexins 36 and 45 in Shaping Spontaneous Firing Patterns in the Developing Retina. *The Journal of Neuroscience* (2011) 31(27), 9998-10008.
- Dranse H.J., et al. Genetic deletion of Cyp26b1 negatively impacts limb skeletogenesis by inhibiting chondrogenesis. *Journal of Cell Science* (2011) 124, 2723-2734.
- Zong M., et al. The Adaptor Function of TRAPPC2 in Mammalian TRAPPs Explains TRAPPC2-Associated SEDT and TRAPPC9-Associated Congenital Intellectual Disability. *PLoS ONE* 6(8): e23350.
- Woo J.A., et al. Pivotal role of the RanBP9-cofilin pathway in Ab-induced apoptosis and neurodegeneration. *Cell Death and Differentiation* (2012) 19, 1413-1423.
- Renaud J., et al. Plexin-A2 and its ligand, Sema6A, control nucleuscentrosome coupling in migrating granule cells. *Nature Neuroscience* (2008) 11(4), 440-449.
- Reiss K., et al. ADAM10 cleavage of N-cadherin and regulation of cell-cell adhesion and b-catenin nuclear signalling. *EMBO Journal* (2005) 24(4), 742-752.
- Jolly S., et al. Cell-Autonomous and Non-Cell-Autonomous Neuroprotective Functions of ROR in Neurons and Astrocytes during Hypoxia. *The Journal of Neuroscience* (2011) 31(40):14314 -14323.
- Beilke S., et al. The zinc-finger protein KCMF1 is overexpressed during pancreatic cancer development and downregulation of KCMF1 inhibits pancreatic cancer development in mice. *Oncogene* (2010) 29, 4058-4067.
- Patzke C., et al. The Coxsackievirus-Adenovirus Receptor Reveals Complex Homophilic and Heterophilic Interactions on Neural Cells. *The Journal of Neuroscience* (2010) 30(8):2897-2910.
- Rehage M., et al. Transgenic Overexpression of Pregnancy-Associated Plasma Protein-A Increases the Somatic Growth and Skeletal Muscle Mass in Mice. *Endocrinology* 148(12):6176-6185.
- Zheng X., et al. Cnot1, Cnot2, and Cnot3 Maintain Mouse and Human ESC Identity and Inhibit Extraembryonic Differentiation. *STEM CELLS* 2012;30:910-922.
- Valkova J., et al. Sorting receptor Rer1 controls surface expression of muscle acetylcholine receptors by ER retention of unassembled  $\alpha$ -subunits. *PNAS* (2011) 108(2), 621-625.
- Dagálv A., et al. Lowered Expression of Heparan Sulfate/Heparin Biosynthesis Enzyme N-Deacetylase/N-Sulfotransferase 1 Results in Increased Sulfation of Mast Cell Heparin. *J Biol Chem* 286:44433-44440.

**Supplementary Table S3.** Predicted mRNA targets to be bound by miR369-3p and miR496, or by miR369-3p, miR496 and miR543.
